# Supplementary material for: Machine learning-assisted single-cell Raman fingerprinting for in situ and nondestructive classification of prokaryotes
Source: PubMed Central journal article supplement — iScience. 2021 Aug 11;24(9):102975. doi: 10.1016/j.isci.2021.102975 (PMC8397914; doi:10.1016/j.isci.2021.102975), 2021-08-11
Supplement: mmc1.pdf [file mmc1.pdf]

iScience, Volume 24

## Supplemental information

### Machine learning-assisted single-cell Raman fingerprinting for *in situ* and nondestructive classification of prokaryotes

Nanako Kanno, Shingo Kato, Moriya Ohkuma, Motomu Matsui, Wataru Iwasaki, and Shinsuke Shigeto

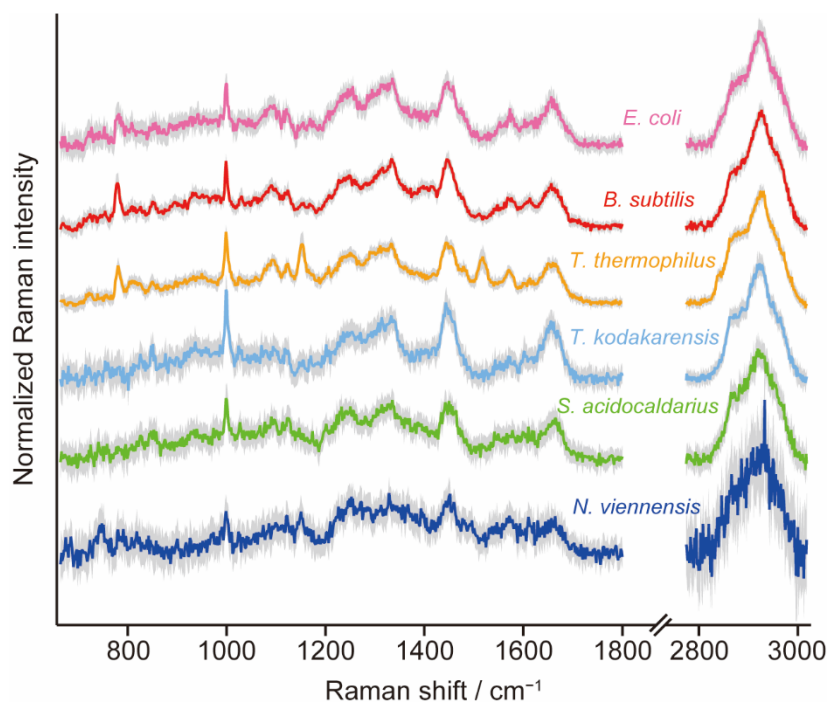

**Figure S1. Average of the preprocessed Raman spectra for each of the six prokaryotic species, related to Figure 2.**

The shaded area represents the  $1\sigma$  error envelop.

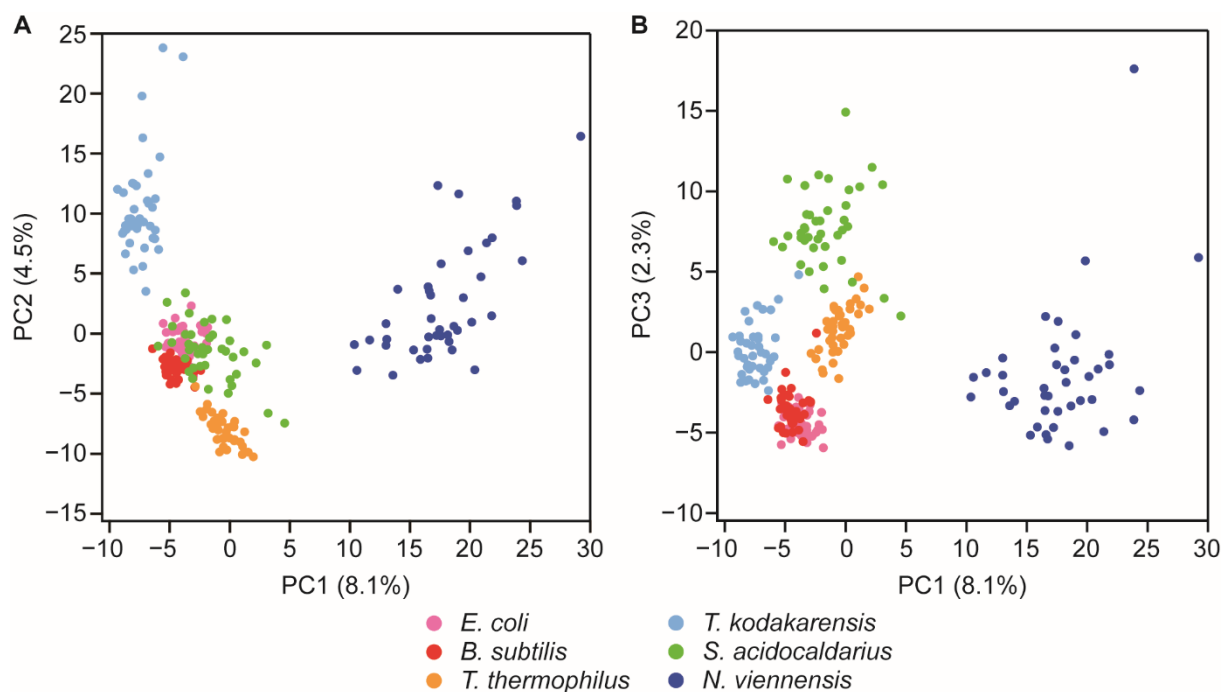

**Figure S2. PCA score plots for the six species, related to Figure 2.**

(A) PC1 vs. PC2.

(B) PC1 vs. PC3.

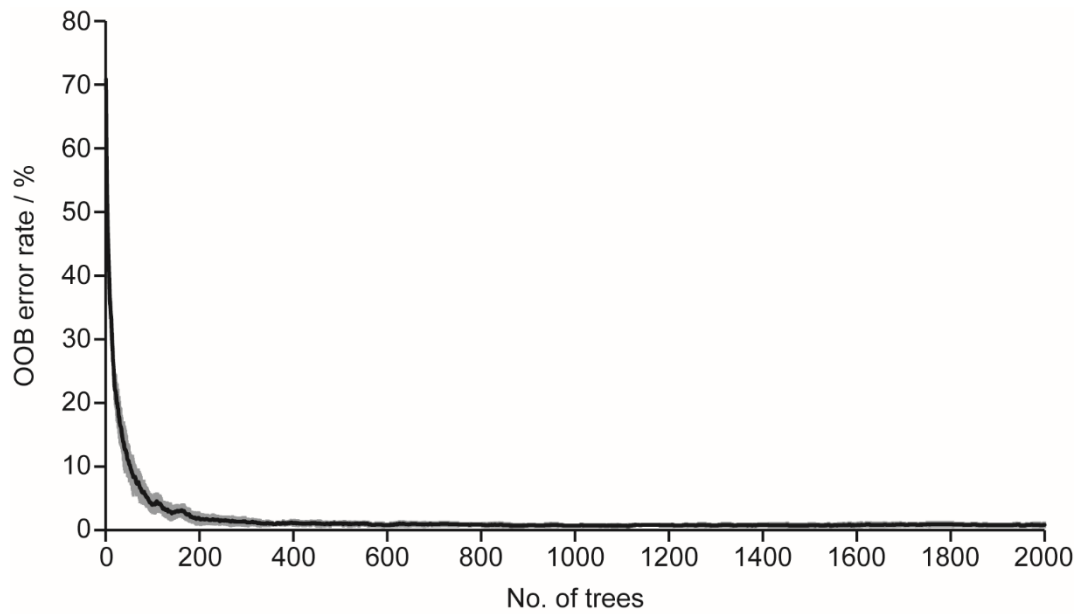

**Figure S3. Out-of-bag (OOB) error rate of the random forest machine learning model for classifying the six prokaryotic species, related to Figure 2.**

The black line shows the mean error rate and the gray part shows standard deviation across 10 training and validation splits.

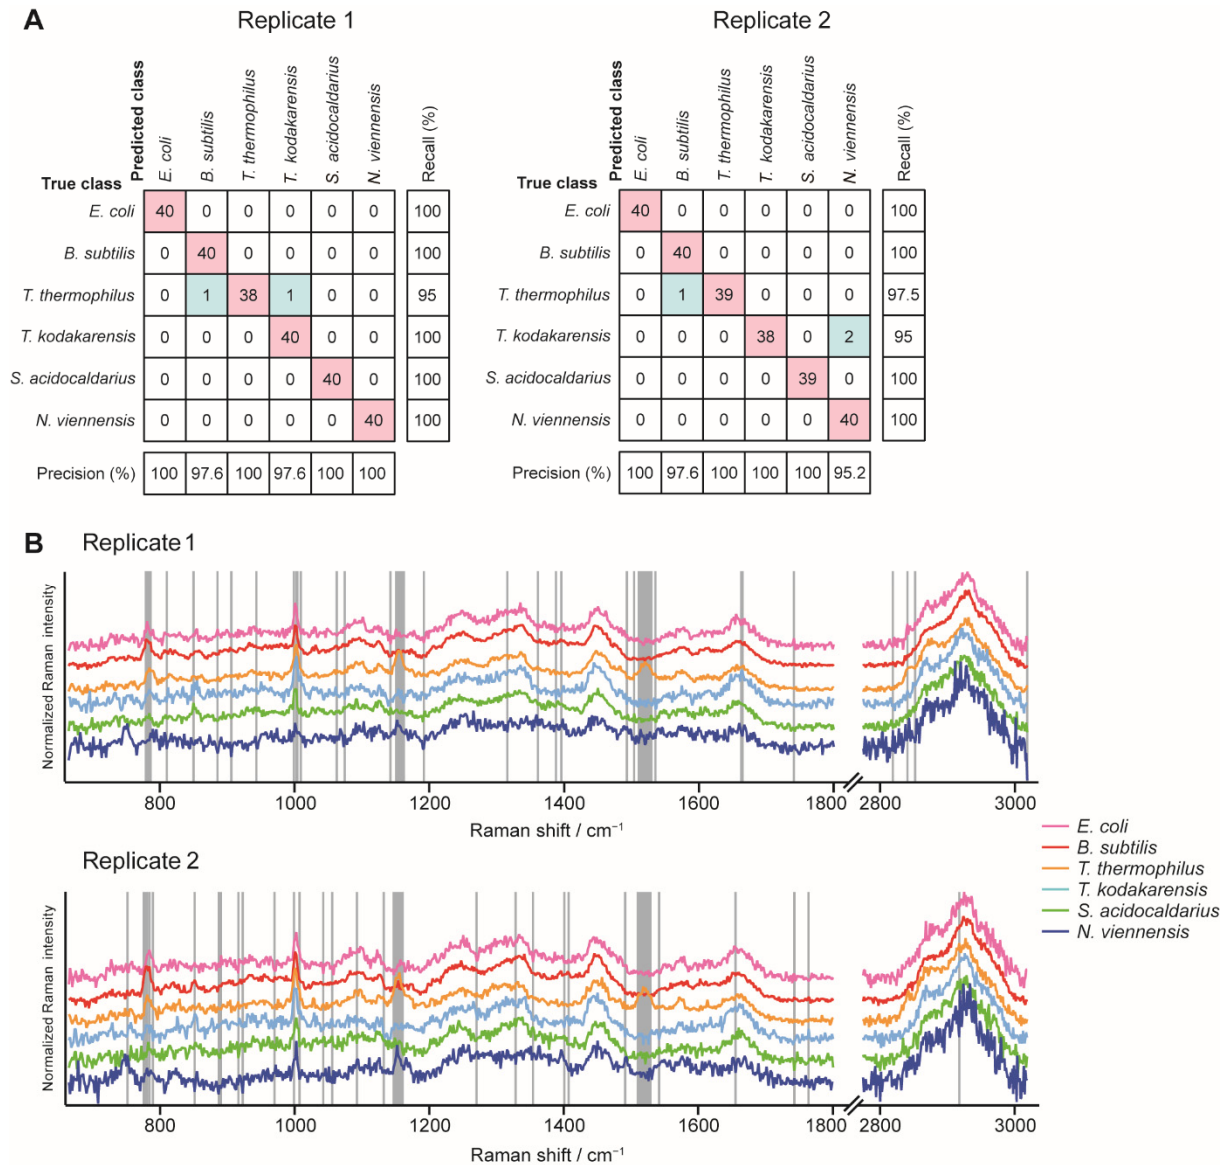

**Figure S4. RF classification of the Raman datasets obtained from the other two independent batches of the six prokaryotic species (denoted replicates 1 and 2 here) than those shown in the main text, related to Figure 2.**

(A) Confusion matrices. The overall validation accuracy was  $99.2 \pm 1.7\%$  for replicate 1 and  $98.8 \pm 1.9\%$  for replicate 2.

(B) Averaged Raman spectra of the six species, together with top 50 most important features (vertical lines).

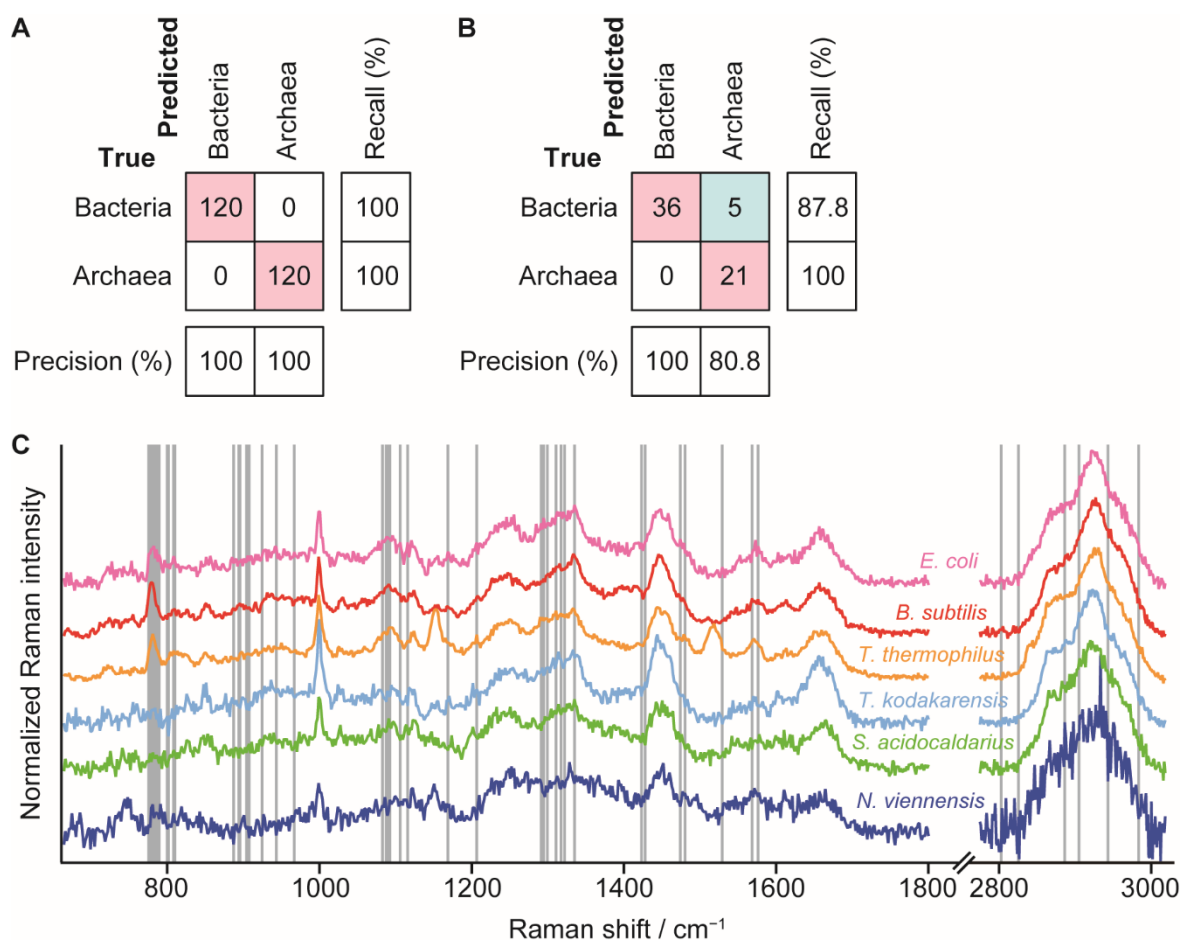

**Figure S5. Bacteria–archaea binary classification, related to Figure 2.**

The three bacterial species (*E. coli*, *B. subtilis*, and *T. thermophilus*) are labeled “Bacteria” and the three archaeal species (*T. kodakarensis*, *S. acidocaldarius*, and *N. viennensis*) “Archaea”. The optimized numbers of trees (*n\_estimators*) and features (*max\_features*) were 200 and 29, respectively.

(A) Confusion matrix, **C**, for two classes in the model construction. Each entry of the confusion matrix,  $C_{ij}$ , represents the total number of spectra known to be in class  $i$  and predicted by the RF model to be in class  $j$  in 10-fold cross-validation. Correct classification results are shown in red boxes on the diagonal. The validation accuracy was 100%. The precision and recall rates are also shown in percentage.

(B) Confusion matrix, **D**, for two classes in the mixed population. Each entry of the confusion matrix,  $D_{ij}$ , represents the number of spectra known to be in class  $i$  and predicted by the RF model to be in class  $j$ . Correct classification results are shown in red boxes on the diagonal, and misclassification results in a blue box. The overall accuracy was 91.9%. The precision and recall rates are also shown in percentage.

(C) Top 50 most important features extracted from the two-class classification result are shown as vertical lines on the averaged spectra.

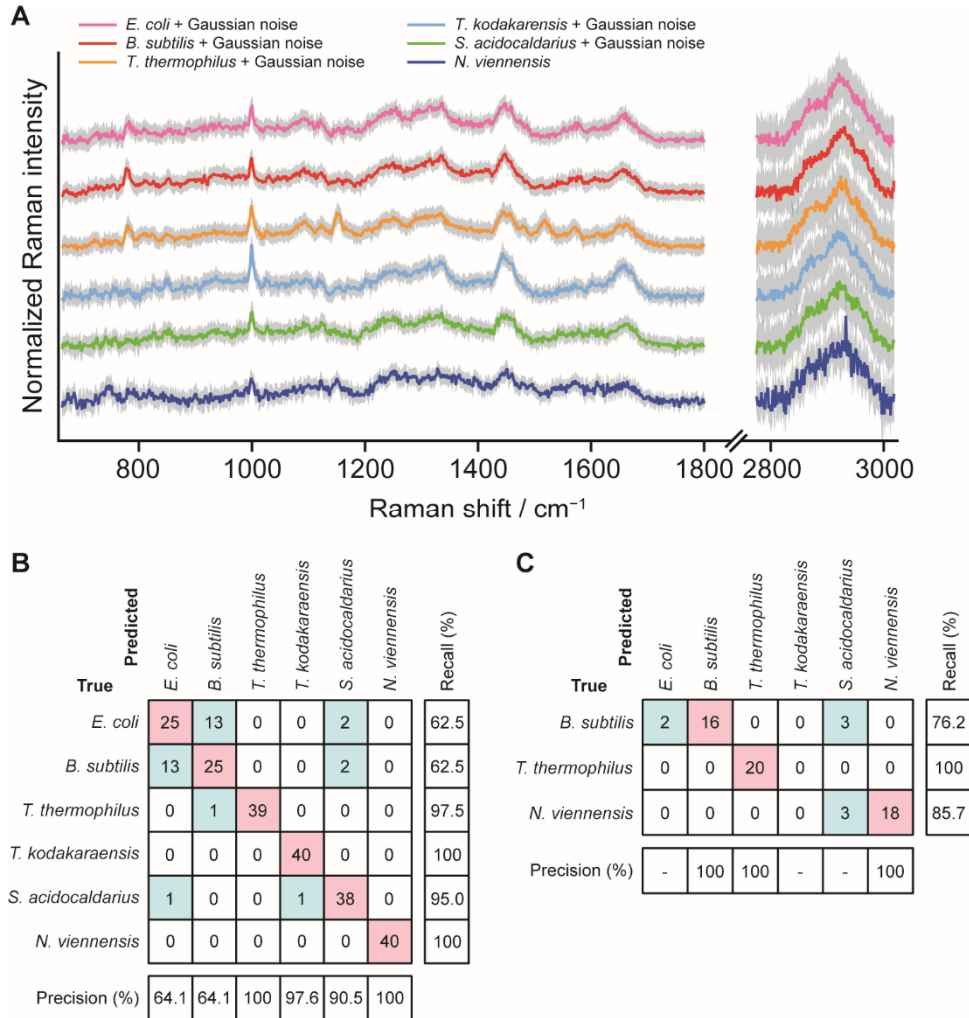

**Figure S6. Effect of artificial addition of Gaussian noise on the random forest classification results, related to Figures 2 and 3.**

The optimized numbers of trees ( $n_{\text{estimators}}$ ) and features was ( $\text{max\_features}$ ) were 700 and 50, respectively.

(A) Average of the noise-added Raman spectra for each of the five prokaryotic species other than *N. viennensis*. No noise was added to the *N. viennensis* spectra. The shaded area represents the  $1\sigma$  error envelope.

(B) Confusion matrix, **C**, for six classes in the model construction. Each entry of the confusion matrix,  $C_{ij}$ , represents the total number of spectra known to be in class  $i$  and predicted by the RF model to be in class  $j$  in 10-fold cross-validation. Correct classification results are shown in red boxes on the diagonal, and misclassification results in blue boxes. The validation accuracy was  $86.3 \pm 7.0\%$ . The precision and recall rates are also shown in percentage.

(C) Performance breakdown for the mixed population. Correct classification results are shown in red boxes, and misclassification results in blue boxes. The values in the table represent the number of spectra (cells). The precision and recall rates are shown in percentage. The overall accuracy was 87.1%.

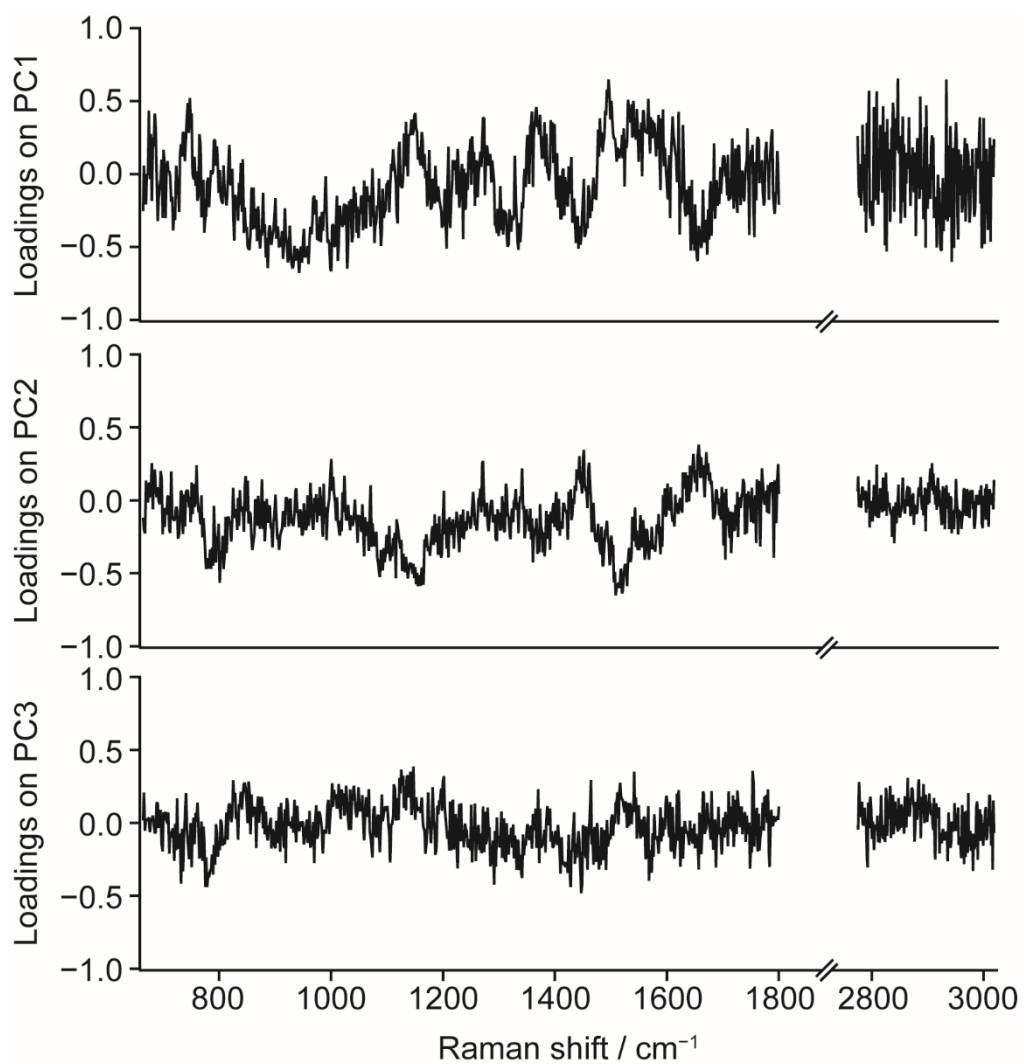

**Figure S7.** Loading spectra of the first three principal components (PC1, PC2, and PC3) derived from the PCA of the single-cell Raman dataset of the six prokaryotic species, related to Figure 2.

| A                        |  |                |                    |                        |                         |                          |                      |            |
|--------------------------|--|----------------|--------------------|------------------------|-------------------------|--------------------------|----------------------|------------|
|                          |  | Predicted      |                    |                        |                         |                          |                      | Recall (%) |
| True                     |  | <i>E. coli</i> | <i>B. subtilis</i> | <i>T. thermophilus</i> | <i>T. kodakaraensis</i> | <i>S. acidocaldarius</i> | <i>N. viennensis</i> |            |
| <i>E. coli</i>           |  | 40             | 0                  | 0                      | 0                       | 0                        | 0                    | 100        |
| <i>B. subtilis</i>       |  | 0              | 40                 | 0                      | 0                       | 0                        | 0                    | 100        |
| <i>T. thermophilus</i>   |  | 0              | 0                  | 40                     | 0                       | 0                        | 0                    | 100        |
| <i>T. kodakaraensis</i>  |  | 0              | 0                  | 0                      | 40                      | 0                        | 0                    | 100        |
| <i>S. acidocaldarius</i> |  | 0              | 0                  | 1                      | 0                       | 39                       | 0                    | 97.5       |
| <i>N. viennensis</i>     |  | 0              | 0                  | 0                      | 0                       | 0                        | 40                   | 100        |
| Precision (%)            |  | 100            | 100                | 97.6                   | 100                     | 100                      | 100                  |            |

  

| B                      |  | Predicted      |                    |                        |                         |                          |                      | Recall (%) |
|------------------------|--|----------------|--------------------|------------------------|-------------------------|--------------------------|----------------------|------------|
| True                   |  | <i>E. coli</i> | <i>B. subtilis</i> | <i>T. thermophilus</i> | <i>T. kodakaraensis</i> | <i>S. acidocaldarius</i> | <i>N. viennensis</i> |            |
| <i>B. subtilis</i>     |  | 1              | 20                 | 0                      | 0                       | 0                        | 0                    | 95.2       |
| <i>T. thermophilus</i> |  | 0              | 0                  | 20                     | 0                       | 0                        | 0                    | 100        |
| <i>N. viennensis</i>   |  | 0              | 0                  | 0                      | 0                       | 2                        | 19                   | 90.5       |
| Precision (%)          |  | -              | 100                | 100                    | -                       | -                        | 100                  |            |

**Figure S8. Random forest species classification using Raman spectra on which noise reduction with singular value decomposition (SVD) was performed, related to Figures 2 and 3.**

(A,B) Performance breakdown. SVD components with negligibly small singular values were discarded as noise, and only the remaining components were used to reconstruct denoised data. Excessive denoising may lead to an increase in the similarity of noise patterns among the spectra, which may affect machine learning modeling. To avoid this, 30% of total SVD components were retained. The optimized numbers of trees ( $n_{estimators}$ ) and features ( $max\_features$ ) were 300 and 29, respectively. The validation accuracy in (A) was  $99.6 \pm 1.3\%$ , and the overall accuracy in (B) was  $95.2\%$ .



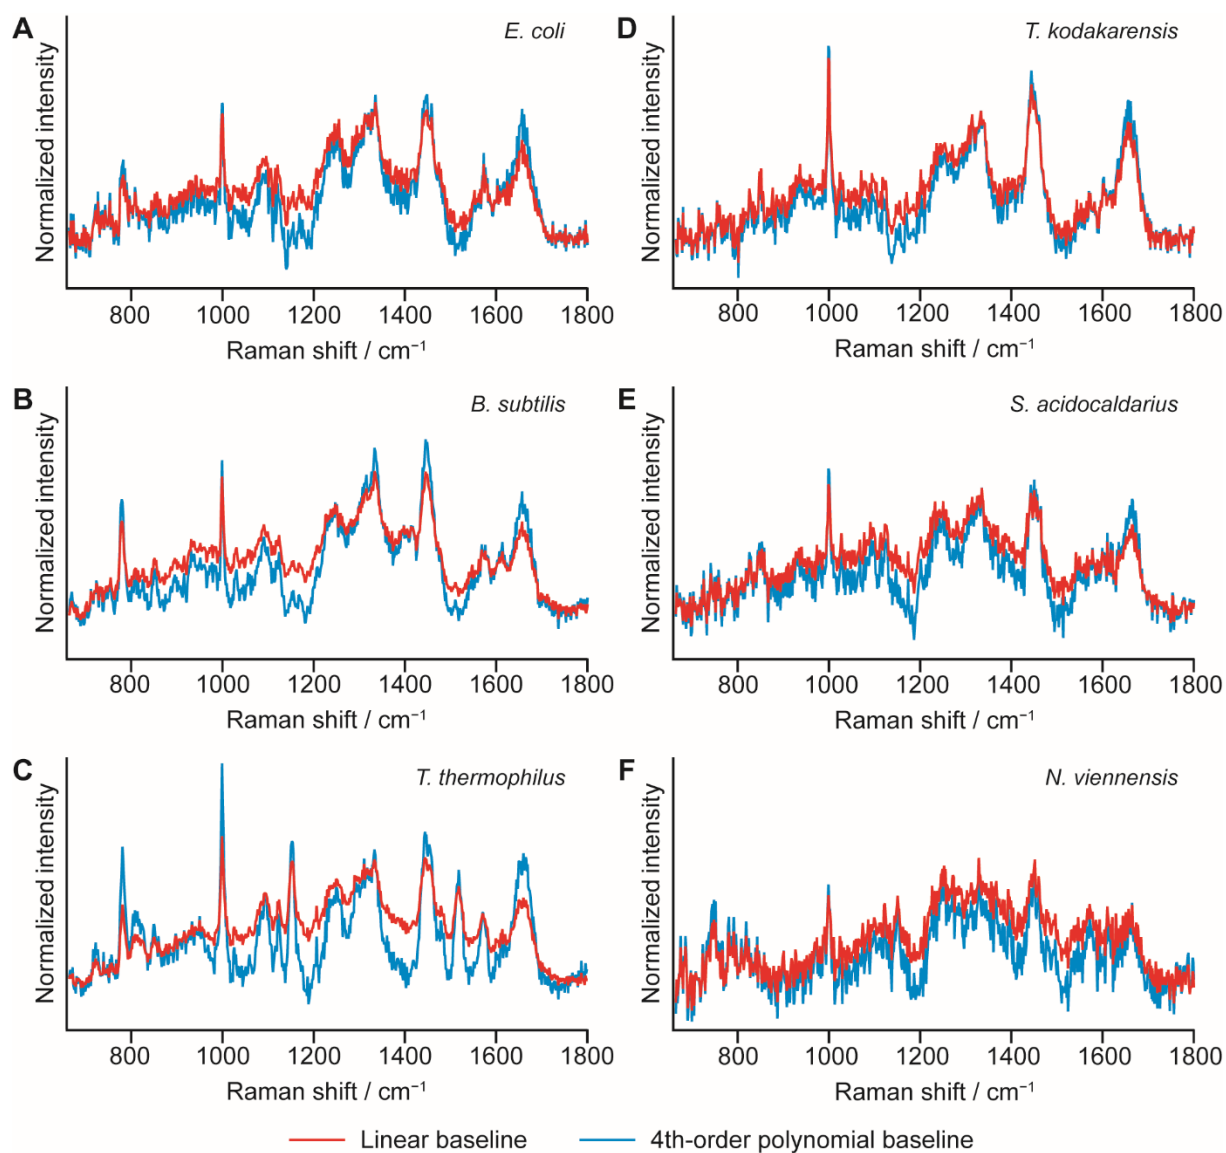

**Figure S9. Averaged Raman spectra with linear (red line) and fourth-order polynomial (blue line) baseline subtracted, of the six prokaryotic species, related to Figure 1.**

(A) *E. coli*

(B) *B. subtilis*

(C) *T. thermophilus*

(D) *T. kodakarensis*

(E) *S. acidocaldarius*

(F) *N. viennensis*

**Table S1. Full list of the top 50 most important features, related to Figure 2 and Table 2.**

| Ranking | Importance <sup>a</sup> | Wavenumber<br>(cm <sup>-1</sup> ) | Assignment                   | Major molecular<br>components |
|---------|-------------------------|-----------------------------------|------------------------------|-------------------------------|
| 32      | 35.9                    | 775.7                             | C, T, U, backbone (P-O-P)    | DNA/RNA                       |
| 11      | 65.9                    | 777.4                             | C, T, U, backbone (P-O-P)    | DNA/RNA                       |
| 9       | 69.4                    | 779.1                             | C, T, U, backbone (P-O-P)    | DNA/RNA                       |
| 35      | 34.1                    | 780.9                             | C, T, U, backbone (P-O-P)    | DNA/RNA                       |
| 8       | 71.2                    | 782.6                             | C, T, U, backbone (P-O-P)    | DNA/RNA                       |
| 48      | 29.8                    | 786.0                             | C, T, U, backbone (P-O-P)    | DNA/RNA                       |
| 25      | 41.0                    | 801.6                             |                              |                               |
| 29      | 39.1                    | 931.5                             |                              |                               |
| 6       | 76.0                    | 999.0                             | Phenylalanine ring-breathing | Proteins                      |
| 1       | 100.0                   | 1000.7                            | Phenylalanine ring-breathing | Proteins                      |
| 34      | 35.0                    | 1111.0                            |                              |                               |
| 36      | 34.1                    | 1137.5                            | C–C str.                     | Carotenoids                   |
| 46      | 30.0                    | 1140.8                            | C–C str.                     | Carotenoids                   |
| 42      | 31.2                    | 1142.4                            | C–C str.                     | Carotenoids                   |
| 49      | 29.5                    | 1145.7                            | C–C str.                     | Carotenoids                   |
| 30      | 38.6                    | 1147.4                            | C–C str.                     | Carotenoids                   |
| 22      | 42.9                    | 1149.1                            | C–C str.                     | Carotenoids                   |
| 5       | 77.2                    | 1150.7                            | C–C str.                     | Carotenoids                   |
| 13      | 56.2                    | 1152.4                            | C–C str.                     | Carotenoids                   |
| 14      | 54.4                    | 1154.0                            | C–C str.                     | Carotenoids                   |
| 10      | 69.1                    | 1155.7                            | C–C str.                     | Carotenoids                   |
| 24      | 41.1                    | 1157.3                            | C–C str.                     | Carotenoids                   |
| 37      | 33.8                    | 1360.9                            |                              |                               |
| 26      | 40.9                    | 1370.5                            |                              |                               |
| 44      | 30.4                    | 1381.7                            |                              |                               |
| 50      | 29.2                    | 1391.3                            |                              |                               |
| 33      | 35.2                    | 1405.7                            |                              |                               |
| 39      | 33.4                    | 1413.7                            |                              |                               |
| 27      | 40.7                    | 1447.1                            | CH bend.                     | Proteins/lipids               |
| 45      | 30.1                    | 1496.2                            |                              |                               |
| 23      | 42.0                    | 1508.8                            | C=C str.                     | Carotenoids                   |
| 16      | 51.7                    | 1510.4                            | C=C str.                     | Carotenoids                   |
| 28      | 39.9                    | 1512.0                            | C=C str.                     | Carotenoids                   |

|    |      |        |                           |                 |
|----|------|--------|---------------------------|-----------------|
| 4  | 83.7 | 1513.6 | C=C str.                  | Carotenoids     |
| 7  | 71.4 | 1515.1 | C=C str.                  | Carotenoids     |
| 2  | 90.9 | 1516.7 | C=C str.                  | Carotenoids     |
| 3  | 85.2 | 1518.3 | C=C str.                  | Carotenoids     |
| 12 | 65.3 | 1519.8 | C=C str.                  | Carotenoids     |
| 15 | 51.7 | 1521.4 | C=C str.                  | Carotenoids     |
| 41 | 32.3 | 1523.0 | C=C str.                  | Carotenoids     |
| 19 | 45.7 | 1524.6 | C=C str.                  | Carotenoids     |
| 31 | 37.0 | 1526.1 | C=C str.                  | Carotenoids     |
| 20 | 45.4 | 1527.7 | C=C str.                  | Carotenoids     |
| 38 | 33.4 | 1568.4 | G, A                      | DNA/RNA         |
| 43 | 30.7 | 1655.4 | Amide I                   | Proteins        |
| 40 | 33.2 | 1661.5 | Amide I                   | Proteins        |
| 18 | 46.6 | 2844.3 | CH <sub>2</sub> sym. str. | Lipids          |
| 17 | 47.3 | 2846.8 | CH <sub>2</sub> sym. str. | Lipids          |
| 47 | 30.0 | 2943.3 | CH str.                   | Proteins/lipids |
| 21 | 44.8 | 2946.9 | CH str.                   | Proteins/lipids |

<sup>a</sup>The highest importance is scaled to 100.

Abbreviations: A, adenine; G, guanine; C, cytosine; T, thymine; U, uracil; str., stretching; bend., bending; sym., symmetric.
